# Supplementary material for: Clopidogrel plus aspirin versus aspirin alone for acute minor ischaemic stroke or high risk transient ischaemic attack: systematic review and meta-analysis
Source: PubMed Central journal article supplement — BMJ. 2018 Dec 18;363:k5108. doi: 10.1136/bmj.k5108 (PMC6298178; doi:10.1136/bmj.k5108), 2018-12-18
Supplement: haoq046115.ww1.pdf [file haoq046115.ww1.pdf]

## Appendix 1: Search strategies and results

### i. MEDLINE Search Strategy and results for Clopidogrel plus aspirin versus aspirin or clopidogrel alone for the treatment of acute minor ischemic stroke or high-risk TIA

1. Ischemic Attack, Transient/ or Stroke/ or brain ischemia/ or brain infarction/ or brain stem infarctions/ or cerebral infarction/ or hypoxia-ischemia, brain/ (152046)
2. ((acute or cerebral or minor or noncardioembolic or isch?emic) adj3 stroke\*).tw. (62468)
3. (tia or tias).tw. (7889)
4. ((transient adj3 isch?em\*) and attack\*).mp. [mp=title, abstract, original title, name of substance word, subject heading word, floating sub-heading word, keyword heading word, protocol supplementary concept word, rare disease supplementary concept word, unique identifier, synonyms] (26811)
5. or/1-4 (178846)
6. platelet aggregation inhibitors/ or exp aspirin/ (65618)
7. (platelet\$ adj5 (inhibi\$ or antagonist\$ or antiaggreg\$ or anti-aggreg\$)).tw. (26161)
8. Blood Platelets/de or exp Platelet Activation/de (37294)
9. (aspirin\* or acetyl salicylic acid\* or acetyl?salicylic acid\* or ASA).mp. (85557)
10. or/6-9 (141358)
11. 5 and 10 (8165)
12. (Clopidogrel or clopilet or grepid or iscover or pcr 4099 or pcr4099 or Plavix or sr 25989 or sr 5990c or sr25989 or sr25990c or zopya or zylagren or zyllt).mp. [mp=title, abstract, original title, name of substance word, subject heading word, floating sub-heading word, keyword heading word, protocol supplementary concept word, rare disease supplementary concept word, unique identifier, synonyms] (12856)
13. 11 and 12 (1703)
14. randomized controlled trial.pt. or randomi?ed.mp. or placebo.mp. (830871)
15. ((treatment or control) adj3 group\*).ab. (525968)
16. (allocat\* adj5 group\*).ab. (21148)
17. ((clinical or control\*) adj3 trial).ti,ab,kw. (234784)
18. or/14-17 (1291602)
19. 13 and 18 (659)
20. limit 19 to yr="2012 -Current" (323)

### ii. EMBASE Search Strategy and results for Clopidogrel plus aspirin versus aspirin or clopidogrel alone for the treatment of acute minor ischemic stroke or high-risk TIA

1. transient ischemic attack/ (34379)
2. cerebrovascular accident/ (167281)
3. brain ischemia/ or brain vasospasm/ (126341)
4. brain infarction/ or brain stem infarction/ or cerebellum infarction/ (49727)
5. hypoxic ischemic encephalopathy/ (5630)
6. ((acute or cerebral or minor or noncardioembolic or isch?emic) adj3 stroke\*).tw. (106874)
7. cerebrovascular accident\*.tw. (9376)
8. (tia or tias).tw. (16884)

9. ((transient adj3 isch?em\*) and attack\*).mp. (38306)
10. or/1-9 (353887)
11. antithrombocytic agent/ (38114)
12. exp acetylsalicylic acid/ (196613)
13. antiplatelet\*.mp. (40928)
14. (platelet\$ adj5 (inhibit\$ or antagonist\$ or antiaggreg\$ or anti-aggreg\$)).tw. (34207)
15. (aspirin\* or acetyl salicylic acid\* or acetyl?salicylic acid\* or ASA).mp. (242520)
16. or/11-15 (299580)
17. 10 and 16 (31888)
18. clopidogrel/ (53115)
19. (Clopidogrel or clopilet or grepid or iscover or pcr 4099 or pcr4099 or Plavix or sr 25989 or sr 5990c or sr25989 or sr25990c or zopya or zylagren or zyllt).mp. [mp=title, abstract, heading word, drug trade name, original title, device manufacturer, drug manufacturer, device trade name, keyword, floating subheading word, candidate term word] (54687)
20. 18 or 19 (54687)
21. 17 and 20 (9887)
22. exp animals/ or exp invertebrate/ or animal experiment/ or animal model/ or animal tissue/ or animal cell/ or nonhuman/ (26219476)
23. human/ or normal human/ or human cell/ (19841721)
24. 22 and 23 (19792580)
25. 22 not 24 (6426896)
26. 21 not 25 (9843)
27. (rat or rats or mouse or mice or swine or porcine or murine or sheep or lambs or pigs or piglets or rabbit or rabbits or cat or cats or dog or dogs or cattle or bovine or monkey or monkeys or trout or marmoset\$1).ti. and animal experiment/ (965734)
28. Animal experiment/ not (human experiment/ or human/) (2000140)
29. 27 or 28 (2040784)
30. 26 not 29 (9841)
31. limit 30 to yr="2012 -Current" (6107)
32. Randomized controlled trial/ (508260)
33. random:.tw. or placebo:.mp. or double-blind:.tw. (1563965)
34. ((treatment or control) adj3 group\*).ab. (750419)
35. (allocat\* adj5 group\*).ab. (27624)
36. ((clinical or control\*) adj3 trial).ti,ab,kw. (342812)
37. Controlled clinical study/ (460083)
38. or/32-37 (2381153)
39. 31 and 38 (1825)

**iii. PsycINFO Search Strategy and results for Clopidogrel plus aspirin versus aspirin or clopidogrel alone for the treatment of acute minor ischemic stroke or high-risk TIA**

1. clopidogrel.mp. (179)
2. (Clopidogrel or clopilet or grepid or iscover or pcr 4099 or pcr4099 or Plavix or sr 25989

or sr 5990c or sr25989 or sr25990c or zopya or zylagren or zyllt).mp. [mp=title, abstract, heading word, table of contents, key concepts, original title, tests & measures] (181)

3. 1 or 2 (181)

**iv. Cochrane library and Cochrane Central Register of Controlled Trials (CENTRAL)  
Search Strategy and results for Clopidogrel plus aspirin versus aspirin or  
clopidogrel alone for the treatment of acute minor ischemic stroke or high-risk TIA**

#1. [mh "Ischemic Attack, Transient"] or [mh ^Stroke] or [mh ^"brain ischemia"] 9053

#2. ((acute or cerebral or minor or noncardioembolic or isch?emic) near/3 stroke\*) 9319

#3. tia or tias 1404

#4. (transient near/3 isch?em\*) and attack\* 866

#5. #1 or #2 or #3 or #4 16640

#6. [mh "platelet aggregation inhibitors"] or [mh aspirin] 7977

#7. (platelet\$ near/5 (inhibit\$ or antagonist\$ or antiaggreg\$ or anti-aggreg\$)) 508

#8. aspirin\* or acetyl salicylic acid\* or acetyl?salicylic acid\* or ASA 22513

#9. #6 or #7 or #8 24736

#10. #5 and #9 1610

#11. Clopidogrel or clopilet or grepid or iscover or pcr 4099 or pcr4099 or Plavix or sr 25989  
or sr 5990c or sr25989 or sr25990c or zopya or zylagren or zyllt 4738

#12. #10 and #11 449

#13. #12 Publication Year from 2012 to 2018 [In Trials] 195
