# Supplementary material for: Clopidogrel plus aspirin versus aspirin alone for acute minor ischaemic stroke or high risk transient ischaemic attack: systematic review and meta-analysis
Source: PubMed Central journal article supplement — BMJ. 2018 Dec 18;363:k5108. doi: 10.1136/bmj.k5108 (PMC6298178; doi:10.1136/bmj.k5108), 2018-12-18
Supplement: haoq046115.ww2.pdf [file haoq046115.ww2.pdf]

## Appendix 2: Forest plots and sensitivity analysis

### 1. Recurrent non-fatal all stroke

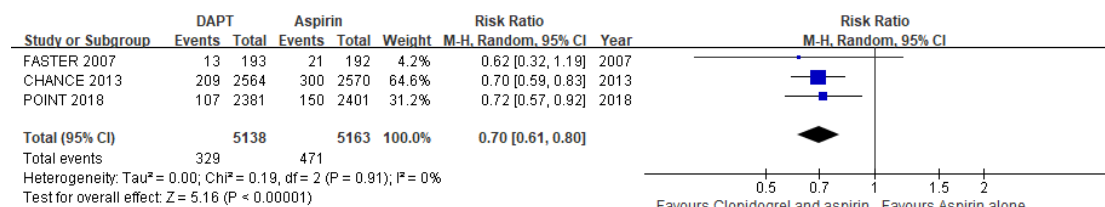

Figure 1: Forest plot showing the risk of recurrent non-fatal all stroke between dual agent antiplatelet therapy and aspirin groups

### 2. Sensitivity Analysis: Recurrent non-fatal all stroke

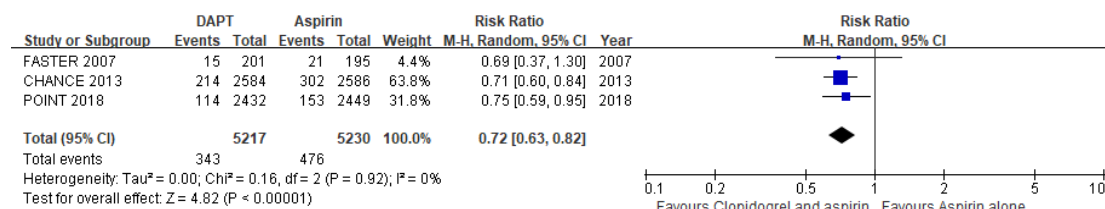

Figure 2: Forest plot showing the risk of recurrent non-fatal all stroke between dual agent antiplatelet therapy and aspirin groups after adjusting for missing data

### 3. Non-fatal ischemic stroke

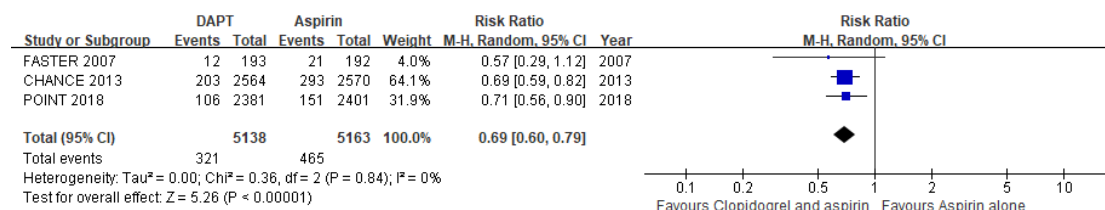

Figure 3: Forest plot showing the risk of non-fatal ischemic stroke between dual agent antiplatelet therapy and aspirin groups

### 4. Sensitivity Analysis: Non-fatal ischemic stroke

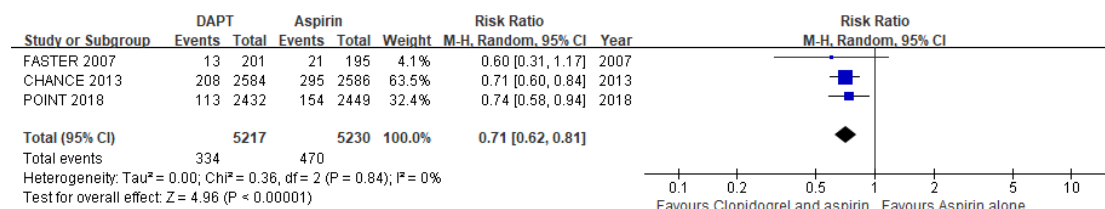

Figure 4: Forest plot showing the risk of non-fatal ischemic stroke between dual agent antiplatelet therapy and aspirin groups after adjusting for missing data

### 5. Symptomatic non-fatal intracranial hemorrhage

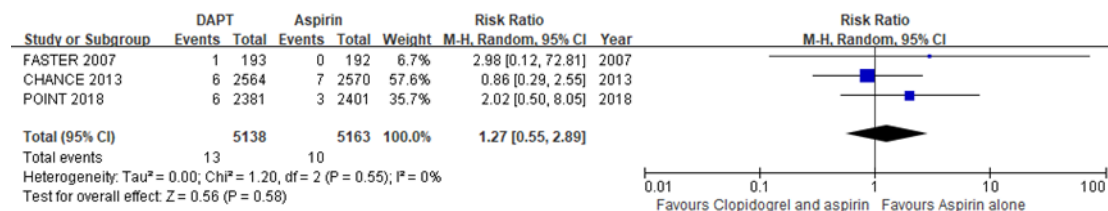

Figure 5: Forest plot showing the risk of symptomatic non-fatal intracranial hemorrhage between dual agent antiplatelet therapy and aspirin groups

### 6. All-cause mortality

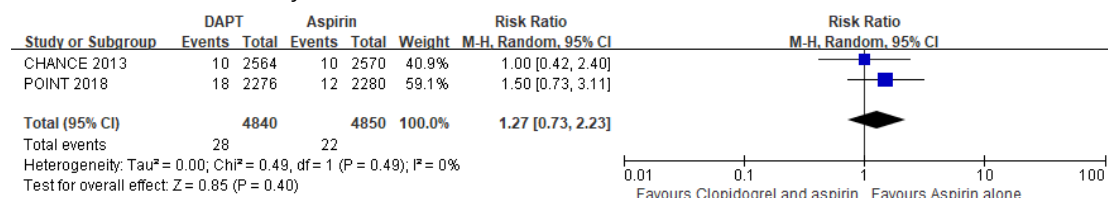

Figure 6: Forest plot showing the risk of all-cause mortality between dual agent antiplatelet therapy and aspirin groups

### 7. Moderate or major non-fatal extracranial hemorrhage

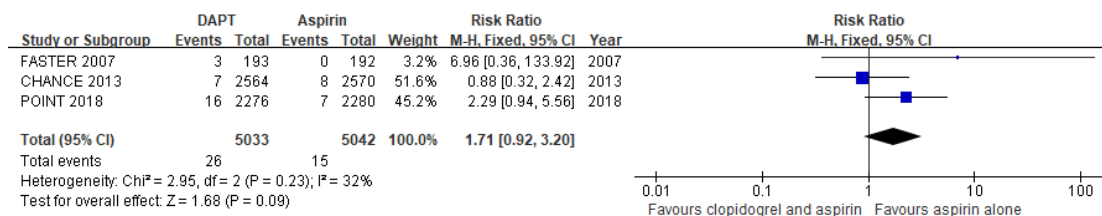

Figure 7: Forest plot showing the risk of moderate or major non-fatal extracranial hemorrhage between dual agent antiplatelet therapy and aspirin groups after adjusting for missing data

### 8. Non-fatal functional disability measured using modified Rankin Scale (mRS: 2-5)

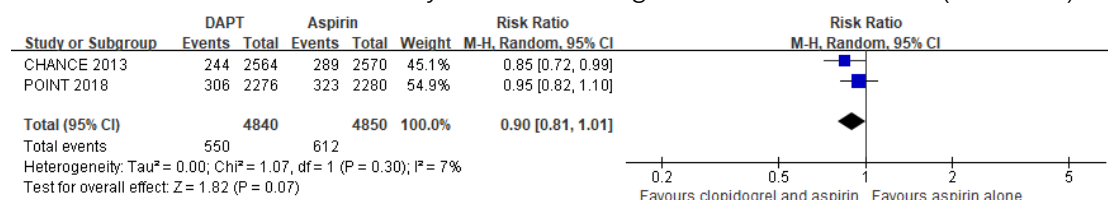

Figure 8: Forest plot showing the risk of non-fatal functional disability measure by modified Rankin Scale (mRS: 2-5) between dual agent antiplatelet therapy and aspirin groups

### 9. Recurrent TIA

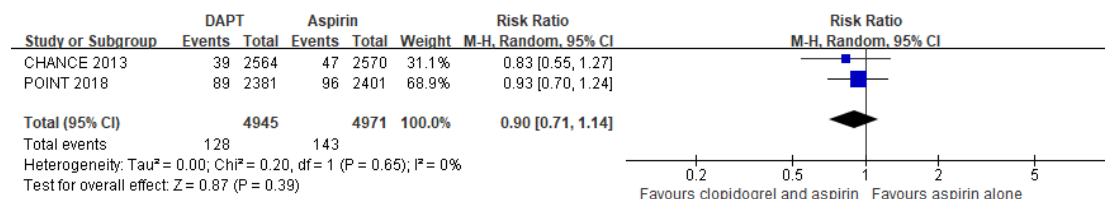

Figure 7: Forest plot showing the risk of recurrent TIA between dual agent antiplatelet therapy and aspirin groups

### 10. Mild extracranial bleeding defined by individual studies

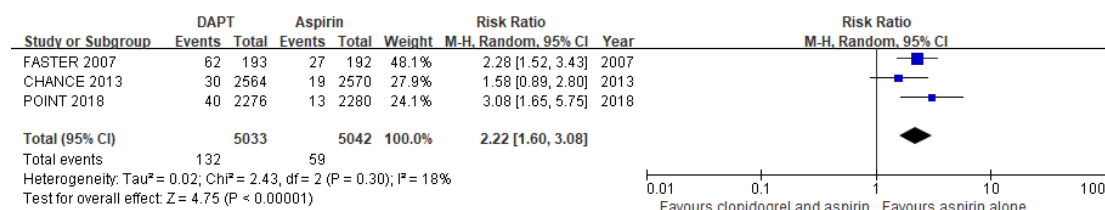

\*Footnote: The POINT 2018 study includes asymptomatic intracranial hemorrhage (5 and 2 in DAPT and aspirin alone group respectively)

Figure 10: Forest plot showing the risk of mild extracranial bleeding defined by individual studies between dual agent antiplatelet therapy and aspirin groups after adjusting for missing data

### 11. Sensitivity Analysis: Mild extracranial bleeding defined by individual studies

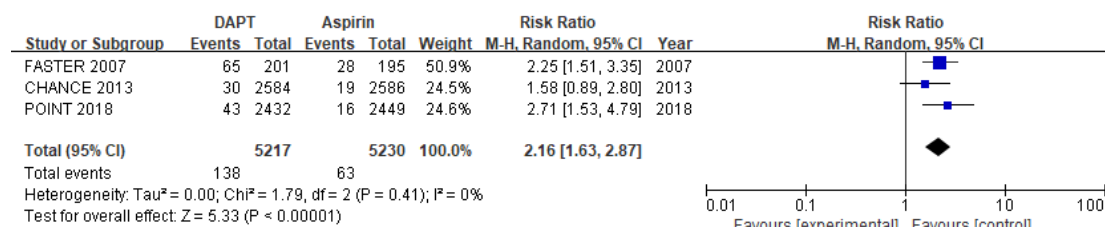

Figure 11: Forest plot showing the risk of mild extracranial bleeding defined by individual studies between dual agent antiplatelet therapy and aspirin groups after adjusting for missing data

### 12. Myocardial infarction

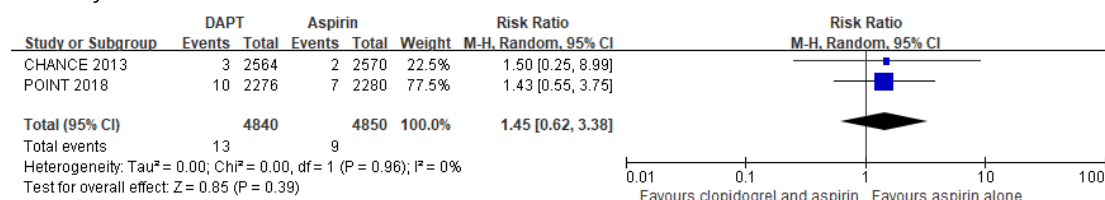

Figure 12: Forest plot showing the risk of myocardial infarction between dual agent antiplatelet therapy and aspirin groups (low quality evidence due to serious imprecision)

13. All recurrent stroke (fatal and non-fatal)

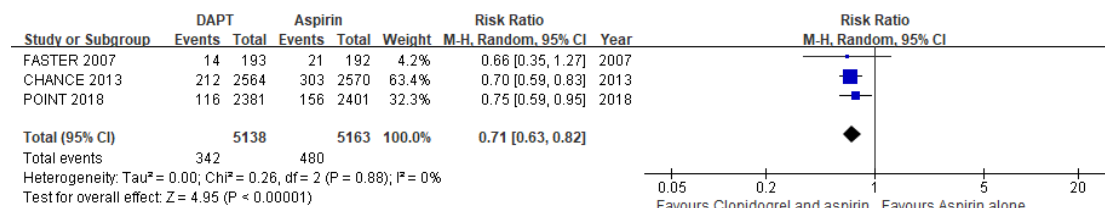

Figure 13: Forest plot showing the risk of all recurrent stroke between dual agent antiplatelet therapy and aspirin groups

14. Sensitivity Analysis: All recurrent stroke (fatal and non-fatal)

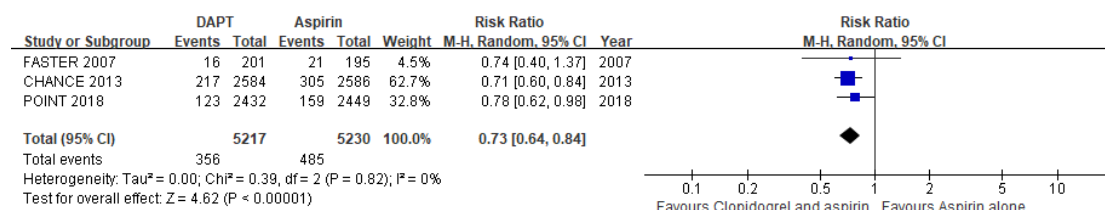

Figure 14: Forest plot showing the risk of all recurrent stroke between dual agent antiplatelet therapy and aspirin groups after adjusting for missing data
